# Supplementary material for: HSPB1 Is Essential for Inducing Resistance to Proteotoxic Stress in Beta-Cells
Source: MDPI journal article supplement (doi:10.3390/cells10092178), 2021-08-24
Supplement: s1 [file s1]

## Supplementary Material

**Supplementary Table S1. List of primary antibodies used for protein detection by Western blot**

| Antibody                   | Specificity | Order Nr | Company                     | Dilution  |
|----------------------------|-------------|----------|-----------------------------|-----------|
| Anti-Phospho-IRE1 $\alpha$ | Monoclonal  | ab48187  | Abcam <sup>1</sup>          | 1:500     |
| Anti-HSP27 (HSPB1)         | Polyclonal  | ab5579   | Abcam <sup>1</sup>          | 1:1000    |
| Anti-ATF6                  | Monoclonal  | sc-22799 | Santa Cruz <sup>2</sup>     | 1:1000    |
| Anti-HSP27 (HSPB1)         | Monoclonal  | sc-13132 | Santa Cruz <sup>2</sup>     | 1:1000    |
| Anti- $\alpha$ -Tubulin    | Monoclonal  | B512     | Sigma-Aldrich <sup>3</sup>  | 1:100.000 |
| Anti-BIM                   | Polyclonal  | 2819     | Cell Signaling <sup>4</sup> | 1:1000    |
| Anti-BIP                   | Polyclonal  | 3183     | Cell Signaling <sup>4</sup> | 1:1000    |
| Anti-Ubiquitin             | Polyclonal  | 3933     | Cell Signaling <sup>4</sup> | 1:1000    |
| Anti-ATF4                  | Monoclonal  | 11815    | Cell Signaling <sup>4</sup> | 1:1000    |
| Anti-CHOP                  | Monoclonal  | 2832     | Cell Signaling <sup>4</sup> | 1:500     |
| Anti-eIF2 $\alpha$         | Monoclonal  | 5324     | Cell Signaling <sup>4</sup> | 1:1000    |
| Anti-GFP                   | Monoclonal  | 2956     | Cell Signaling <sup>4</sup> | 1:1000    |
| Anti-IRE1 $\alpha$         | Monoclonal  | 3294     | Cell Signaling <sup>4</sup> | 1:1000    |
| Anti-PERK                  | Monoclonal  | 3192     | Cell Signaling <sup>4</sup> | 1:1000    |
| Anti-XBP1s                 | Monoclonal  | 12782    | Cell Signaling <sup>4</sup> | 1:1000    |
| Anti-Phospho-eIF2 $\alpha$ | Monoclonal  | 3597     | Cell Signaling <sup>4</sup> | 1:1000    |
| Anti-Phospho-PERK          | Monoclonal  | 3179     | Cell Signaling <sup>4</sup> | 1:1000    |

<sup>1</sup> Abcam Plc, Cambridge, UK. <sup>2</sup> Santa Cruz Biotechnology, California, USA. <sup>3</sup>

Sigma-Aldrich, St Louis, USA. <sup>4</sup>Cell Signaling Technology, Beverly, Massachusetts, USA.

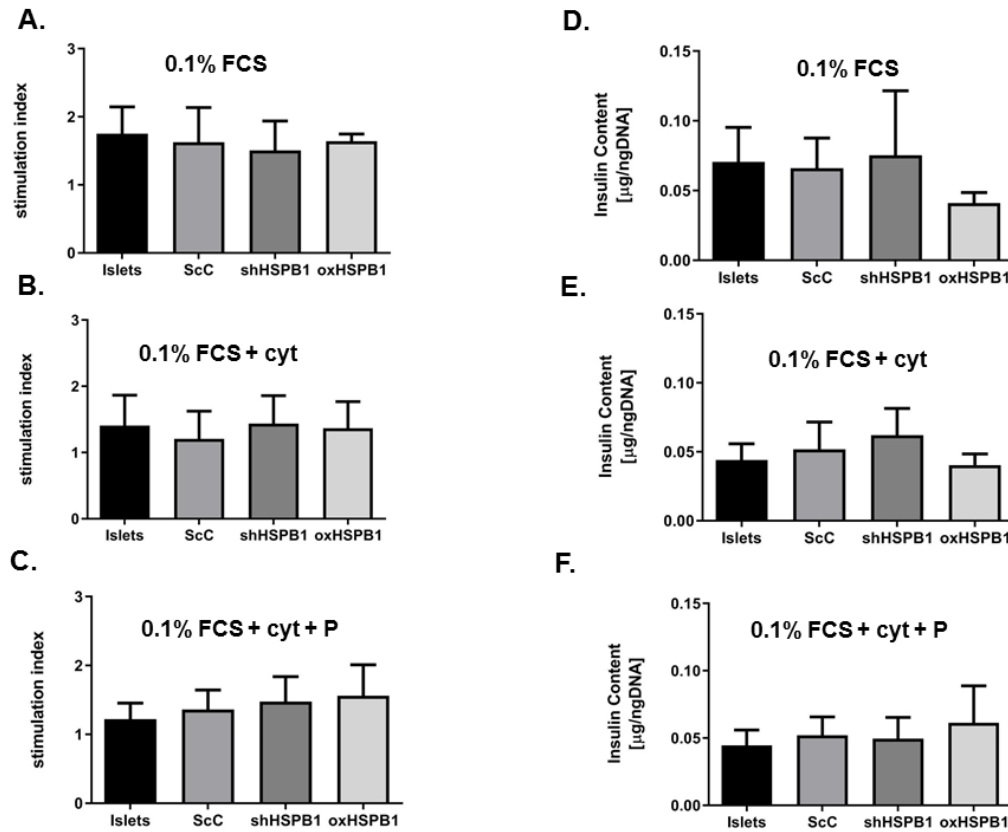

**Supplementary Figure S1. Secretory function and insulin content of primary cultures of mouse islets.** (A-C) Functional assay of mouse islets: mouse islets, HSPB1 silenced (shHSPB1) or not (ScC) or mouse islets overexpressing HSBP1 (oxHSPB1) were treated with (A) vehicle, (B) pro-inflammatory cytokines (cyt) in the absence or (C) in the presence of PRL (P) and incubated for two hours in the presence of media containing low or high glucose concentration. The secretory function of the cells was assayed and expressed as stimulation index. Stimulation index: (Concentration of insulin secreted in medium containing 16.7mM of glucose)/ (Concentration of insulin secreted in medium containing 2.8mM of glucose). (D-F) Insulin content in primary culture of mouse islets. Total insulin content of mouse islets, HSPB1 silenced (shHSPB1) or not (ScC) or mouse islets overexpressing HSBP1 (oxHSPB1) were treated with (D) vehicle, (E) pro-inflammatory cytokines (cyt) in the absence or (F) in the presence of PRL (P). The data were normalized by the total DNA content per sample. Results are presented as mean  $\pm$  SEM (n= 3 independent experiments). The results displayed no significant differences between them. Islets: control mouse islets; ScC: islets infected with scramble shRNA, control C; shHSPB1: islets infected with short

hairpin for HSPB1 and oxHSPB1: islets transiently transfected with pEGFPhsp27 wt FL.

**A**

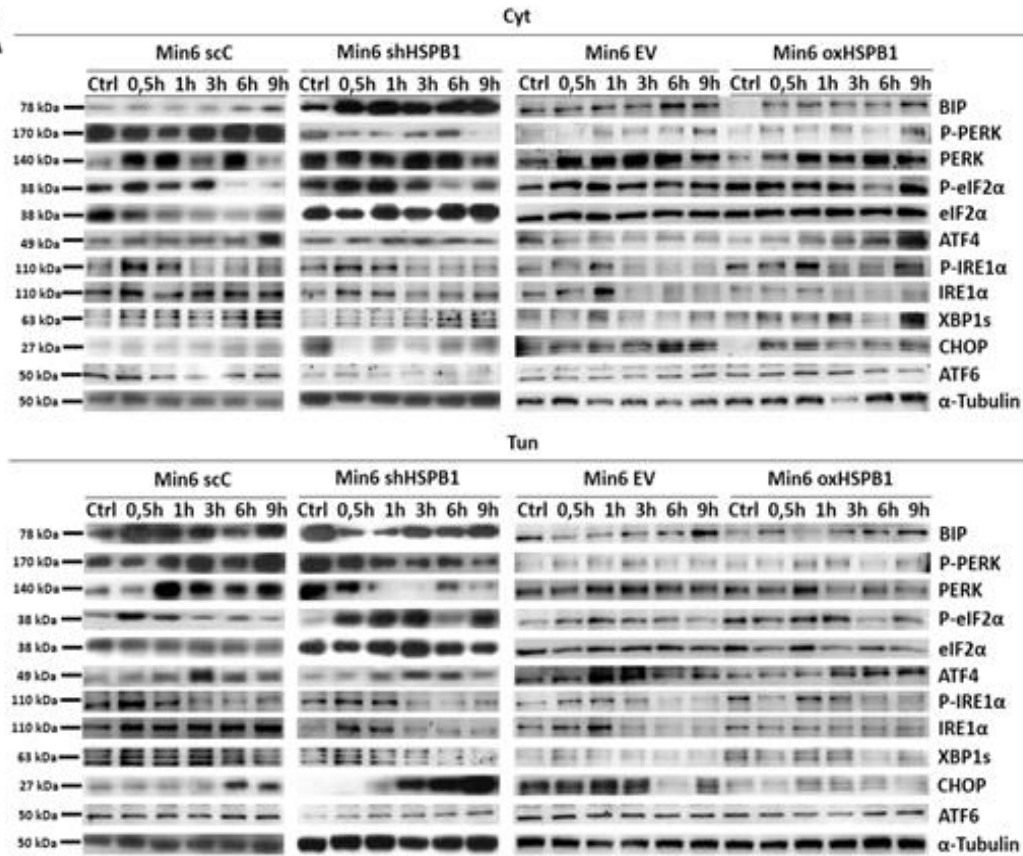

**B**

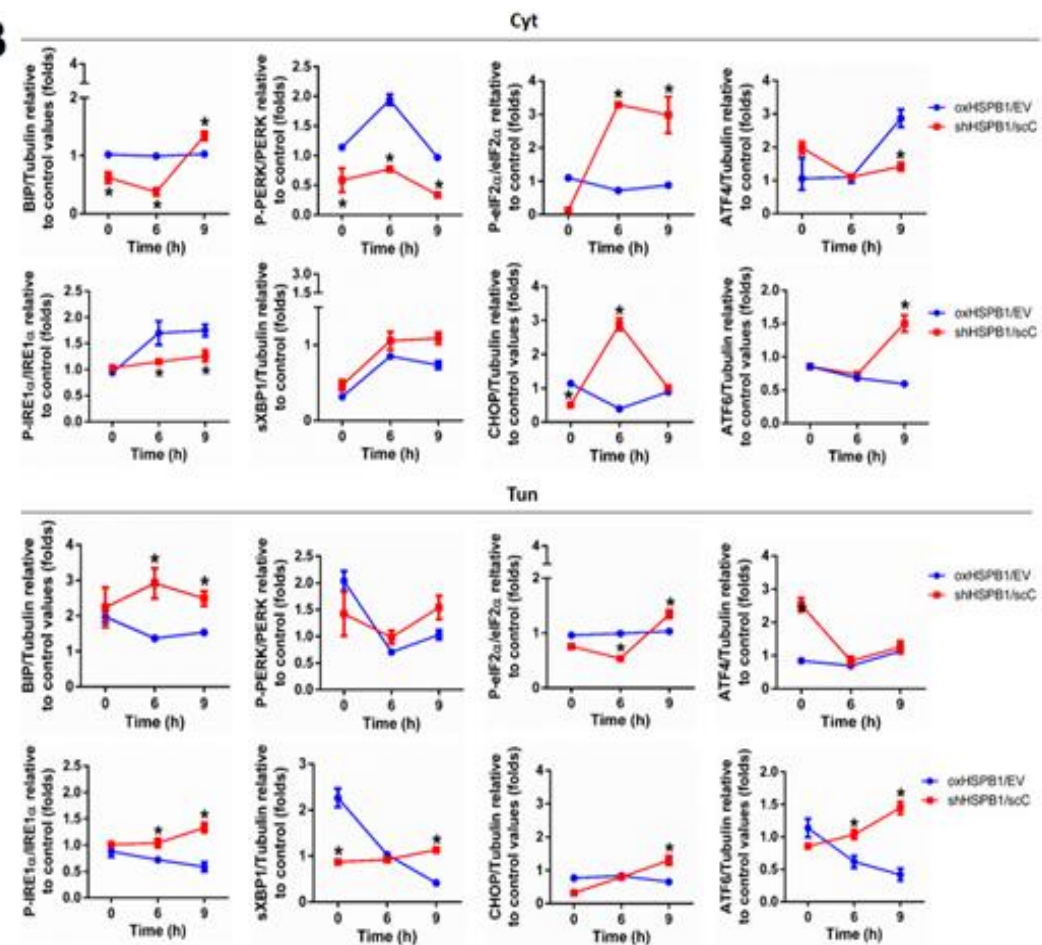

**Supplementary Figure S2. Increased HSPB1 expression modulates the UPR in Min6 cells under ER stress induced by pro-inflammatory cytokines or tunicamycin.** HSPB1 silenced (Min6 shHSPB1) or overexpressing Min6 cells (Min6 oxHSPB1) and their respective controls (Min6 scC, Min6 EV) were exposed after serum starvation, to a combination of cytokines (TNF- $\alpha$  8 ng/mL, INF- $\gamma$  16 ng/mL, IL-1- $\beta$  1.6 ng/mL) or tunicamycin (15  $\mu$ g/mL) for 0.5, 1, 3, 6 and 9 h. **(A)** Immunoblots of islets are shown as representative results. **(B)** Graphical representation of protein levels of ATF4, ATF6, BIP, CHOP, XBP1s and  $\alpha$ -tubulin (used as a loading control), as well as phosphorylation state of PERK, eIF2 $\alpha$  and IRE1 $\alpha$  were analyzed by western blotting. After normalization of each protein to the corresponding  $\alpha$ -tubulin, the data of the silenced HSPB1 cells (shHSPB1) or overexpressed (oxHSPB1) were plotted as the ratio between the values obtained in silenced or overexpressing cells and the one in their respective controls (scC or EV). \*: p < 0.05 vs. oxHSPB1.

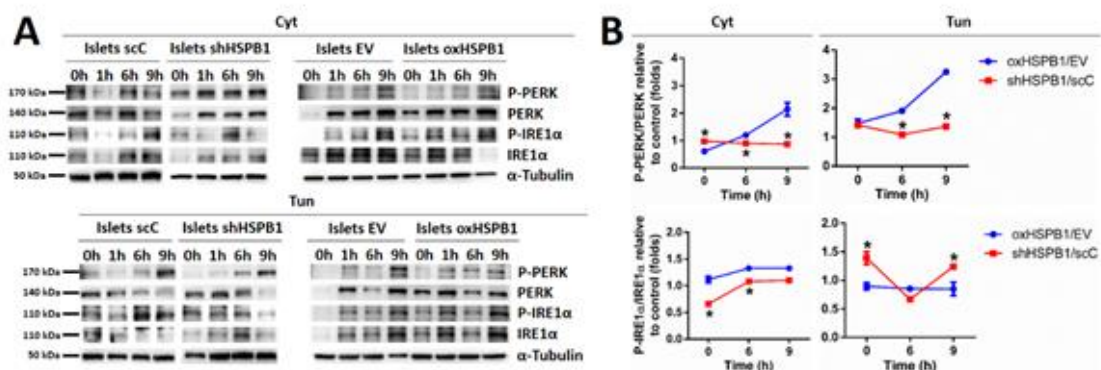

**Supplementary Figure S3. Increased HSPB1 expression modulates PERK and IRE1 $\alpha$  phosphorylation in mouse islets under ER stress induced by pro-inflammatory cytokines or tunicamycin.** HSPB1 silenced (shHSPB1) or

overexpressing mouse islets (oxHSPB1) and their respective controls (scC, EV) were exposed after serum starvation, to a combination of cytokines (TNF $\alpha$  8 ng/mL, INF $\gamma$  16 ng/mL, IL-1 $\beta$  1.6ng/mL) or tunicamycin (15  $\mu$ g/mL) for 0.5, 1, 3, 6 and 9 h. Phosphorylation levels of PERK and IRE1 $\alpha$  were analyzed by western blotting. **(A)** Immunoblots are shown as representative results. Graphical representation presented as arbitrary densitometry units (AU). After the normalization of each protein to the corresponding  $\alpha$ -tubulin, the data of the HSPB1 silenced (shHSPB1) or overexpressing cells (oxHSPB1) were normalized with their respective controls (scC or EV). Each data point represents means  $\pm$  SEM from three replicates and at least three independent experiments were carried out for each cell type submitted to the different cell incubation conditions. \*:  $p < 0.05$  vs. oxHSPB1/EV.

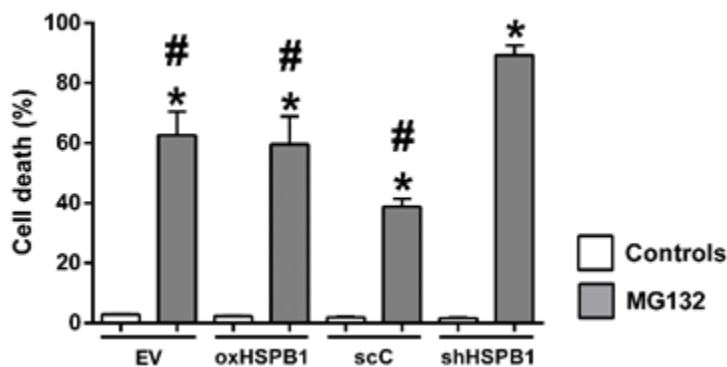

**Supplementary Figure S4. The presence of HSPB1 promotes a higher cell death of murine pancreatic beta-cell with inhibited proteasome.** Min6 cells overexpressing HSPB1 (Min6 oxHSPB1) and their respective controls (Min6 EV), were submitted to serum starvation (0.1% FCS) and were treated with the proteasome inhibitor MG132 (100 nM) for 16 h. Cell death was then evaluated

by microscopy. Results are presented as means  $\pm$  SEM of three independent experiments. \*:  $p < 0.05$  vs. control (vehicle), #:  $p < 0.05$  vs. shHSPB1.

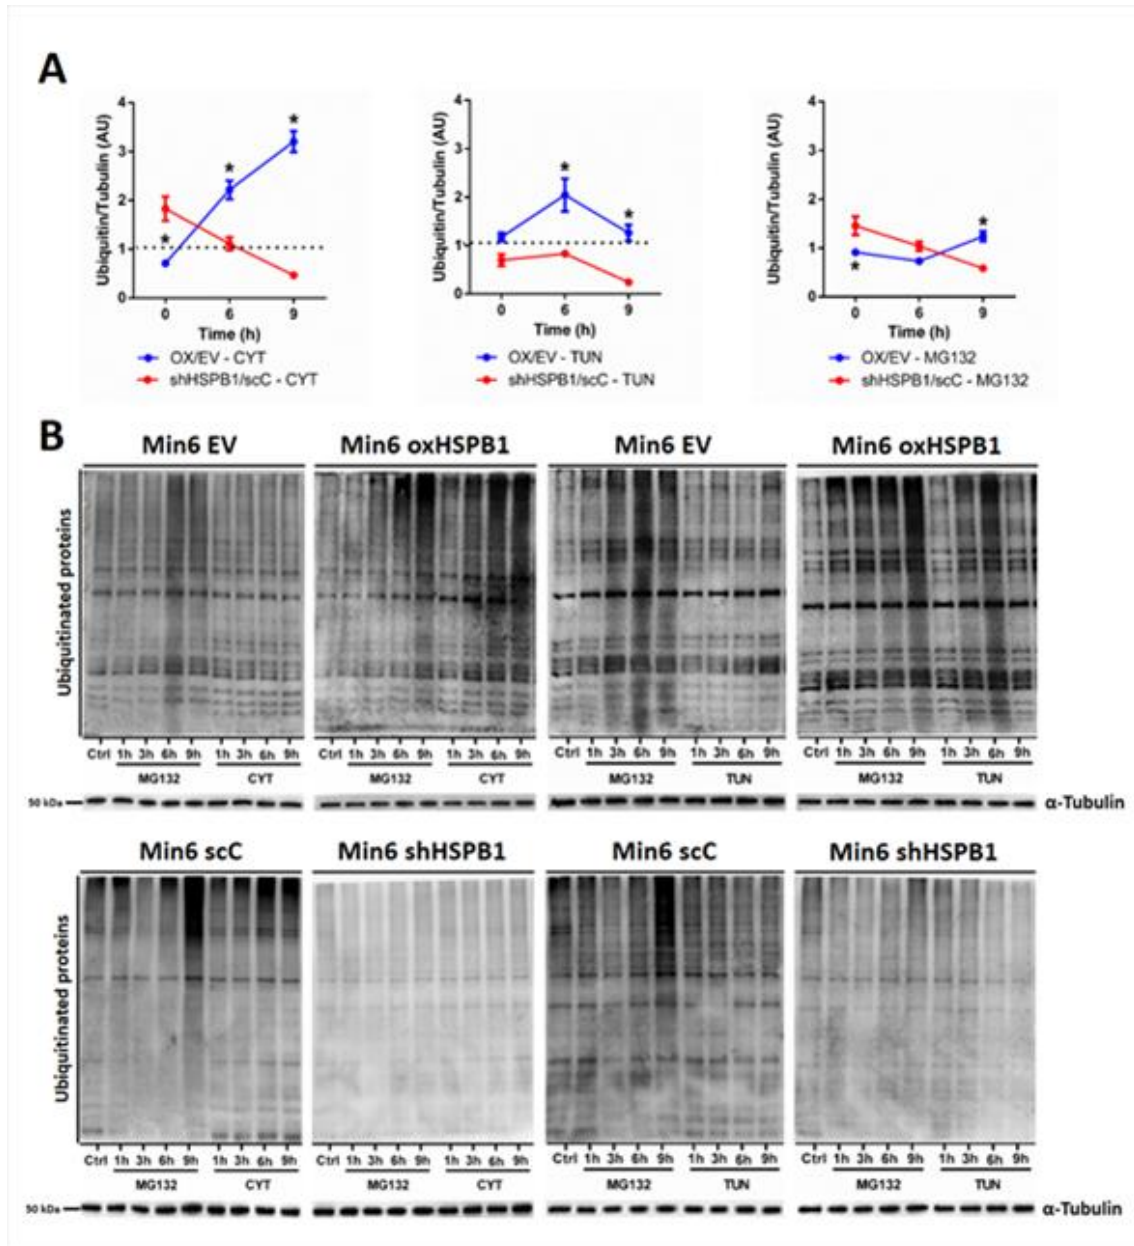

**Supplementary Figure S5. HSPB1 levels modulates global protein ubiquitination in Min6 cells.** HSPB1 silenced cells (shHSPB1) or overexpressing (oxHSPB1) and their respective controls (scC, EV) were serum starved and then exposed to combination of cytokines (TNF- $\alpha$  8 ng/mL, INF- $\gamma$  16 ng/mL, IL-1- $\beta$  1.6 ng/mL), tunicamycin (15  $\mu$ g/mL) or MG132 (2  $\mu$ M) for 1, 3,



6 and 9 h. **(A)** Graphical representation of ubiquitinated proteins detection presented as arbitrary densitometry units (AU) after normalization to the corresponding  $\alpha$ -tubulin. **(B)** Representative images of the immunoblots showing the levels of ubiquitinated proteins of Min6 cells treated with cytokines or tunicamycin. Each data point represents means  $\pm$  SEM from three replicates and at least three independent experiments were carried out for each cell type submitted to the different cell incubation conditions; \*:  $p < 0.05$  vs shHSPB1/scC.

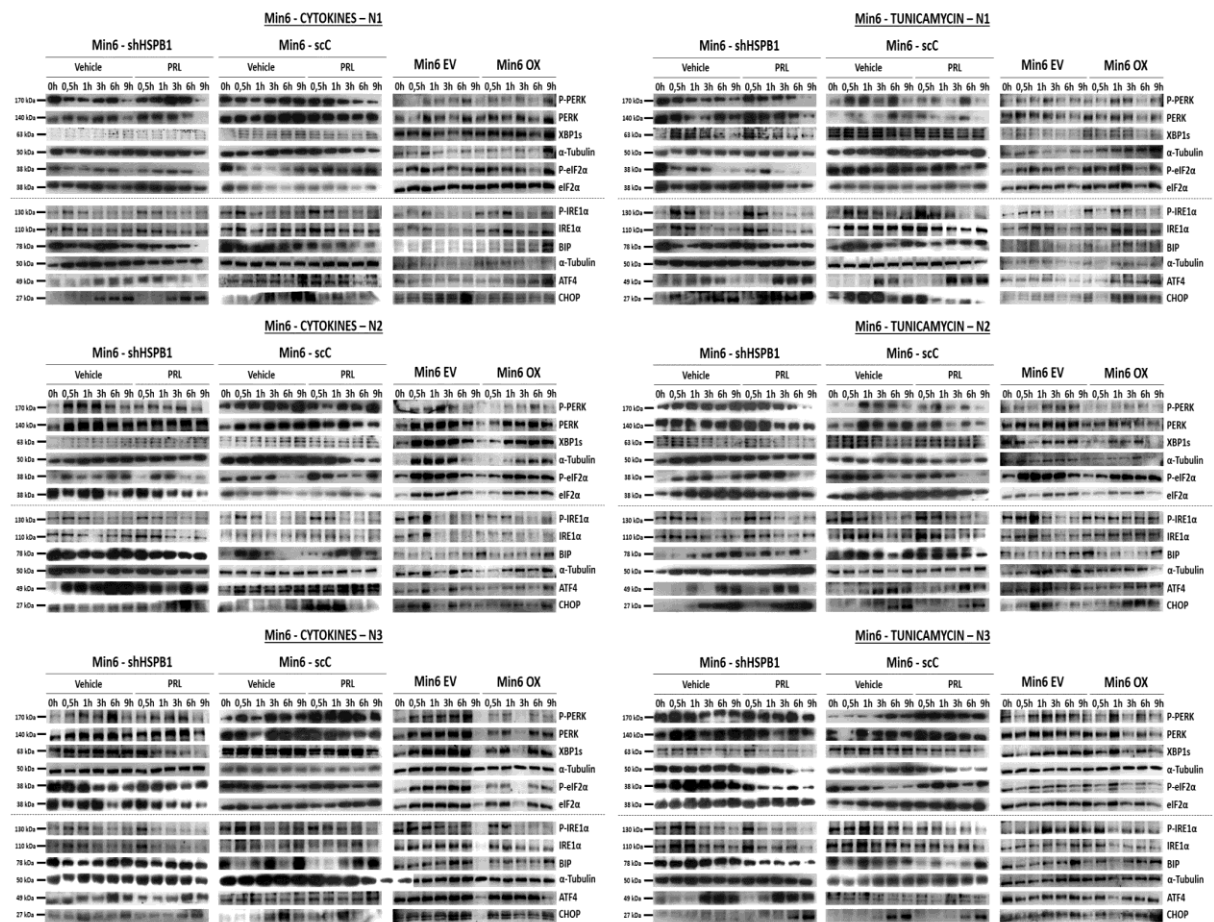



## CYTOKINES – N1

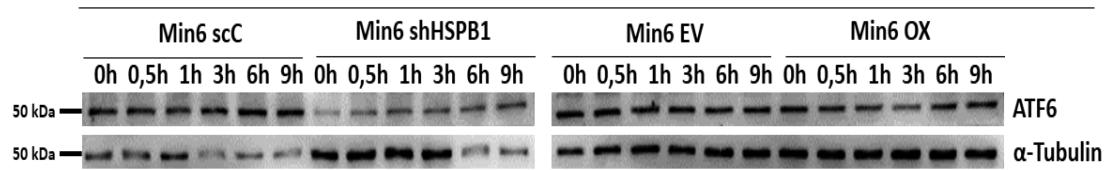

## CYTOKINES – N2

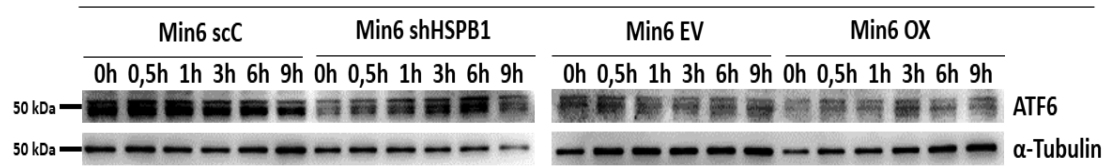

## CYTOKINES – N3

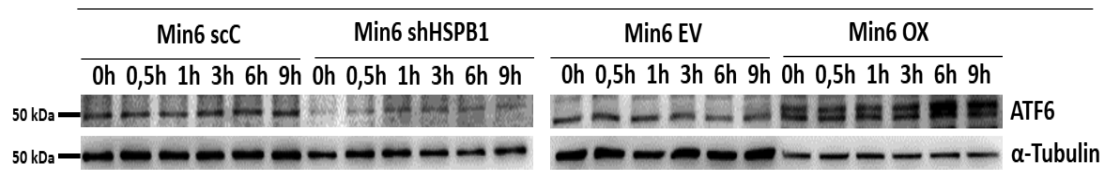

## TUNICAMYCIN – N1

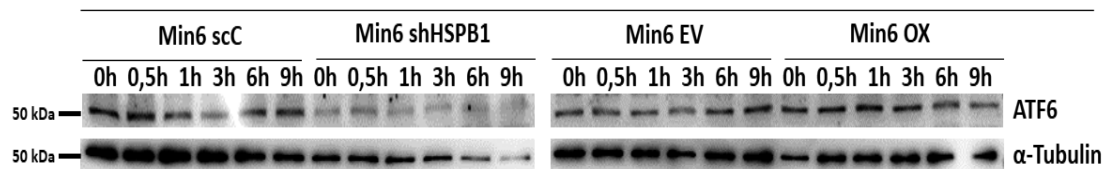

## TUNICAMYCIN – N2

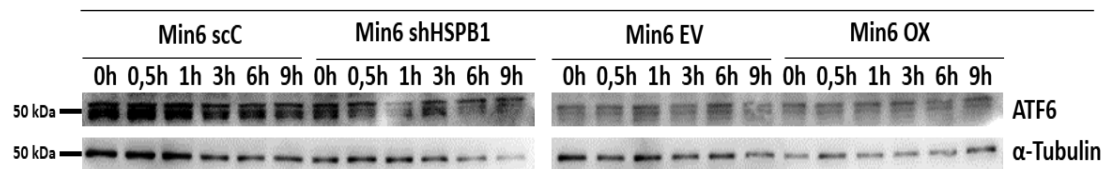

## TUNICAMYCIN – N3

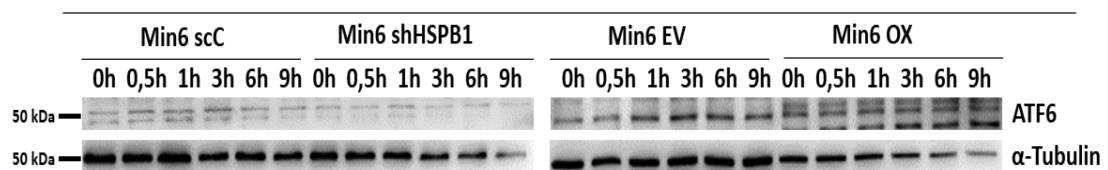

### ISLETS - CYTOKINES – N1

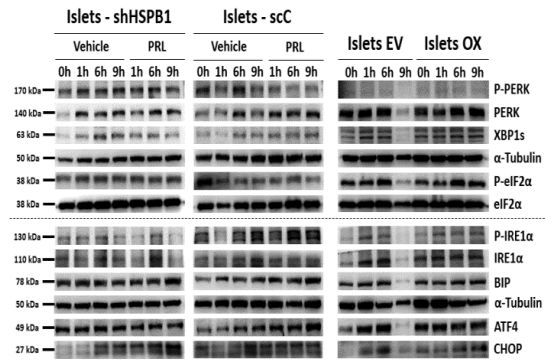

### ISLETS - TUNICAMYCIN – N1

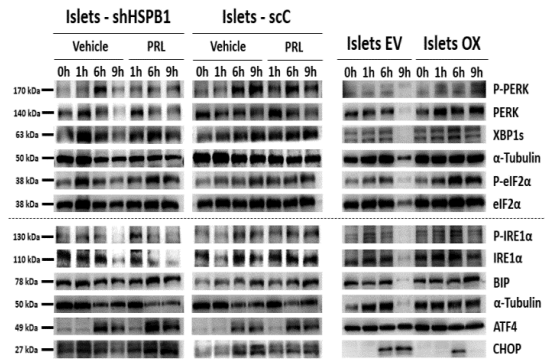

### ISLETS - CYTOKINES – N2

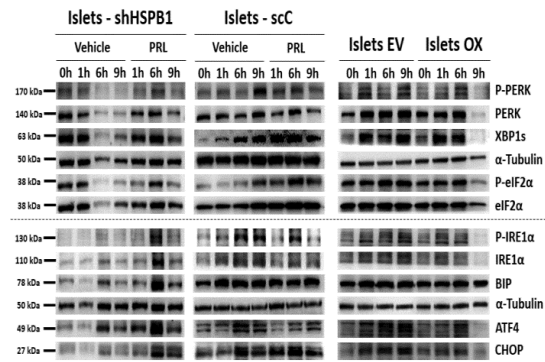

### ISLETS - TUNICAMYCIN – N2

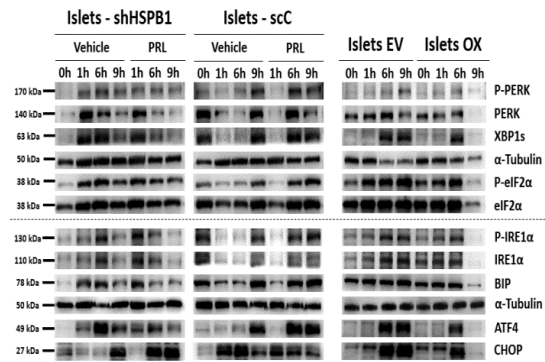

### ISLETS - CYTOKINES – N3

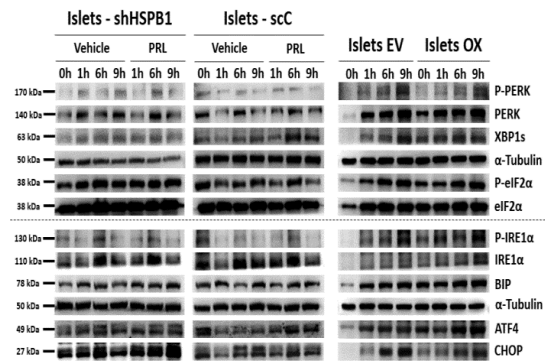

### ISLETS - TUNICAMYCIN – N3

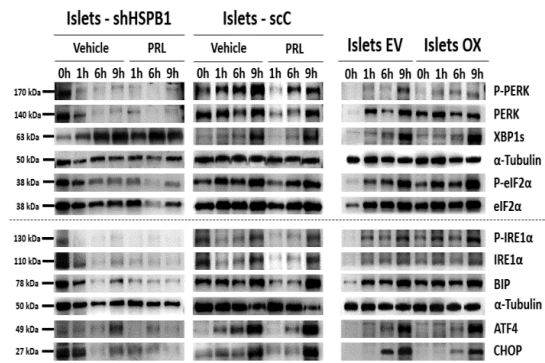

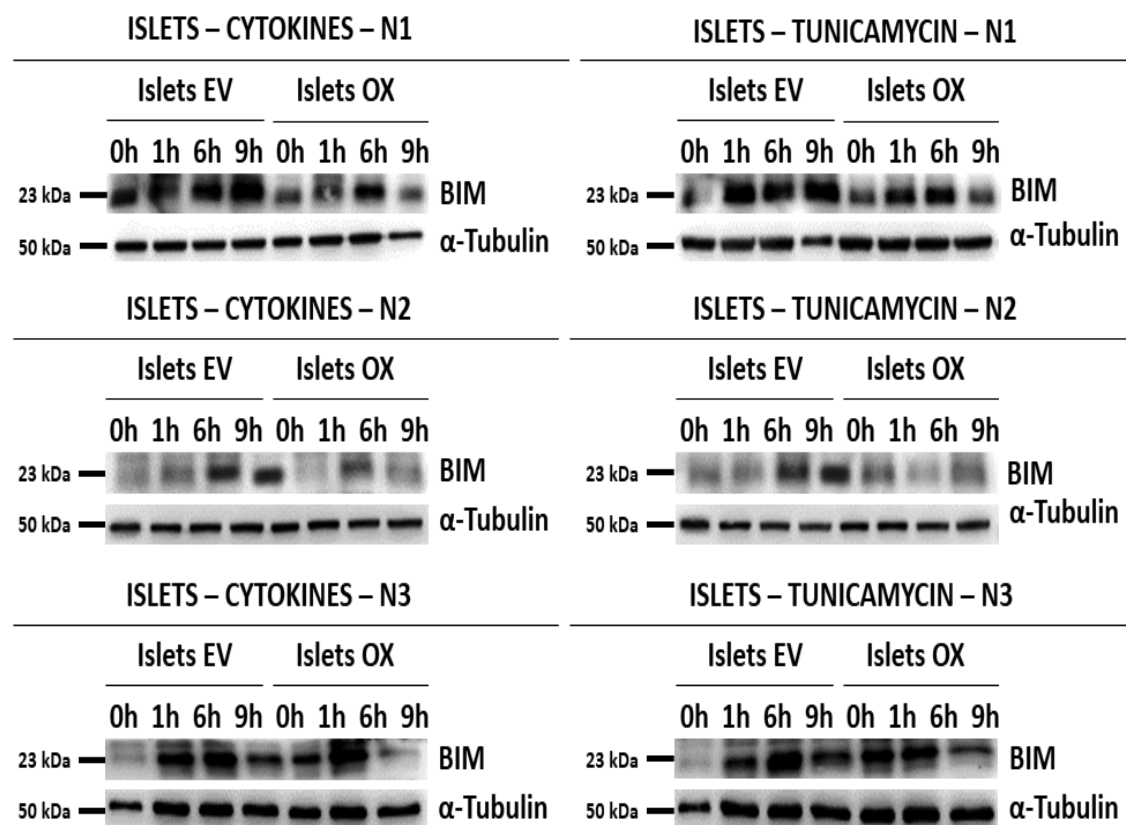

Supplementary Figure S6. Uncropped blots
